# Supplementary material for: Monitoring of Nitrification in Chloraminated Drinking Water Distribution Systems With Microbiome Bioindicators Using Supervised Machine Learning
Source: Frontiers journal article supplement (doi:10.3389/fmicb.2020.571009), 2020-09-16
Supplement: Image_3.PDF [file Image_3.PDF]

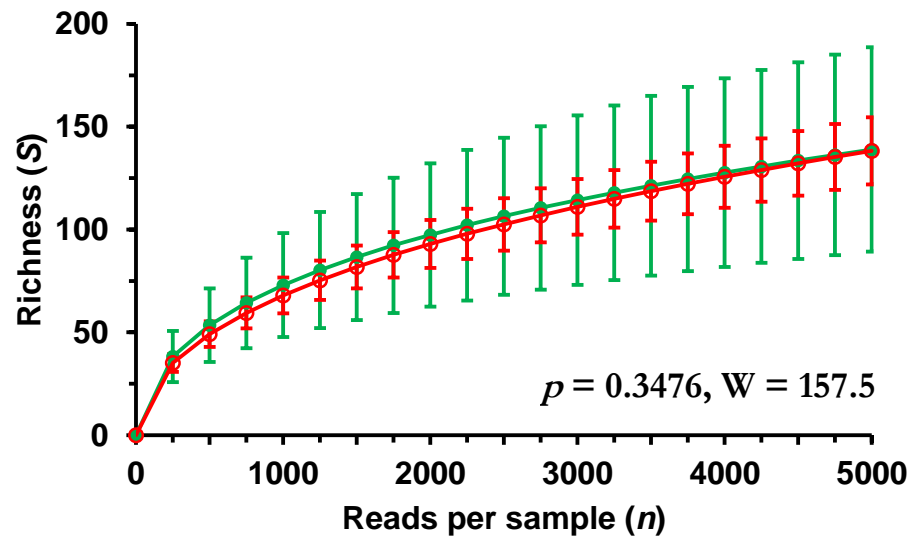

**Figure S3. Microbial diversity.** Rarefaction curves for the DWDS bulk water microbiomes. For comparison, specie frequencies were normalized to the smallest library ( $n = 5\,000$ ). The  $p$  value was calculated by the Wilcoxon-Mann-Whitney test. Significance set at  $\alpha = 0.01$ . Samples: Stable (SS, ●), Failure (SF, ●) events.
